# Supplementary material for: Non-polar organic compounds in autumn and winter aerosols in a typical city of eastern China: size distribution and impact of gas–particle partitioning on PM 2.5 source apportionment
Source: Copernicus journal article supplement (doi:10.5194/acp-18-9375-2018), 2018-07-04
Supplement: Supplementary file 1 [file acp-18-9375-2018-supplement.pdf]

Supplement of Atmos. Chem. Phys., 18, 9375–9391, 2018  
<https://doi.org/10.5194/acp-18-9375-2018-supplement>  
© Author(s) 2018. This work is distributed under  
the Creative Commons Attribution 4.0 License.

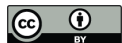

*Supplement of*

**Non-polar organic compounds in autumn and winter aerosols in a typical city of eastern China: size distribution and impact of gas–particle partitioning on PM<sub>2.5</sub> source apportionment**

**Deming Han et al.**

*Correspondence to:* Jinping Cheng (jpcheng@sjtu.edu.cn)

The copyright of individual parts of the supplement might differ from the CC BY 4.0 License.

31 **Section S1. PMF analysis and uncertainty assessment**

32 Positive matrix factorization (PMF) is considered an advanced algorithm among various receptor models, which has been  
33 successfully applied for source identification of environmental pollutants (Han et al., 2014; Basis et al., 2016; Han et al.,  
34 2018). PMF has the following advantages: each data point is given an uncertainty-weighting; the factors in PMF are not  
35 necessarily orthogonal to each other and there is no non-negativity constraint with PMF. In the present study, PMF 5.0  
36 (US EPA) was used to apportion the contributions of different sources to PM<sub>2.5</sub> in the atmosphere. The matrix X  
37 represents an ambient data set in which i represents the number of samples and j the number of chemical species. The  
38 goal of multivariate receptor modeling is to identify sources (p), the species profile (f) of each source and the amount of  
39 mass (g) contributed by each source to each individual sample as well as the residuals (e<sub>ij</sub>), as following equation:

40 
$$X_{ij} = \sum_{k=1}^p g_{ik} f_{kj} + e_{ij} \quad (S1)$$

41 The PMF solution minimizes the objective function Q based on these uncertainties (u):

42 
$$Q = \sum_{i=1}^n \sum_{j=1}^m \left[ \frac{X_{ij} - \sum_{k=1}^p g_{ik} f_{kj}}{u_{ij}} \right]^2 \quad (S2)$$

43 The input data files of PMF consist of concentrations and uncertainty matrices, and the uncertainty data were calculated  
44 as Equation (S3) as suggested by PMF User Guide. The missing values were represented by average values, while  
45 measurements below MDL (method detection limit) were replaced by two times of the corresponding MDL values. The  
46 “weak” variables were down-weighted, while “bad” variables were omitted from the analysis process.

47 
$$\begin{cases} \text{Unc}_i = \frac{5}{6} \times \text{MDL}_i & C_i \leq \text{MDL}_i \\ \text{Unc}_i = \sqrt{(C_i \times \text{Error Fraction})^2 + \left(\frac{1}{2} \times \text{MDL}_i\right)^2} & C_i > \text{MDL}_i \end{cases} \quad (S3)$$

48 The model was run 20 times with 25 random seeds to determine the stability of goodness-of-fit values. If the number of  
49 sources is estimated properly, the theoretical Q value should be approximately the number of degrees of freedom or the  
50 total number of data points. Five to eleven factors were examined, and eight factors were found to be the most  
51 appropriate and most reasonably interpretable. Q (True) is the goodness-of-fit parameter calculated including all points,  
52 while Q (Robust) is the goodness-of-fit parameter calculated excluding points not fit by the model, Q (Robust) and Q  
53 (True) were 1,752.4 and 1,812.9, respectively. Additionally, approximately 98% of the residuals calculated by PMF were  
54 within the range of -3 to 3, indicating a good fit of simulated results. The factor did not show oblique edges, suggesting  
55 there were little rotation for the solution. All these features implied the model simulation result was acceptable.

## 56 Section S2. NPOC analysis using TD-GC/MS

57 Table S1. Abbreviation,  $P^o_L$  and  $\Delta H_0$ , retention time and quantification ion information information for individual NPOCs

| Species                                      | Abb.                                   | $P^o_L$ <sup>a</sup> | $\Delta H_0$ <sup>b</sup> | Base peak (m/z) | Retention Time (RT) |
|----------------------------------------------|----------------------------------------|----------------------|---------------------------|-----------------|---------------------|
| <b>PAHs</b>                                  |                                        |                      |                           |                 |                     |
| Fluorene                                     | FLO                                    | 1.10E-01             | 84.9                      | 166             | 19.25               |
| Phenanthrene                                 | PHE                                    | 2.57E-02             | 88.9                      | 178             | 24.41               |
| Anthracene                                   | ANT                                    | 1.21E-03             | 99.7                      | 178             | 24.56               |
| Fluoranthene                                 | FLU                                    | 1.60E-03             | 98.3                      | 166             | 28.03               |
| Pyrene                                       | PYR                                    | 7.60E-04             | 97.9                      | 202             | 28.66               |
| Benz[a]anthracene                            | BaA                                    | 3.45E-05             | 108                       | 228             | 32.30               |
| Chrysene                                     | CHR                                    | 1.36E-06             | 118.8                     | 228             | 32.41               |
| Benzo[b]fluoranthene                         | BbF                                    | 1.00E-06             | 119.2                     | 252             | 35.32               |
| Benzo[j+k]fluoranthene                       | BkF                                    | 4.66E-06             | 113                       | 252             | 35.37               |
| Benzo[a]fluoranthene                         | BaF                                    | 4.66E-05             | 113                       |                 | 36.13               |
| Benzo[a]pyrene                               | BaP                                    | 7.89E-07             | 117.9                     | 252             | 36.01               |
| Indeno[1,2,3-cd]pyrene                       | IcdP                                   | 1.42E-06             | 124                       | 276             | 39.22               |
| Dibenz[a,h]+[a,c]anthracene                  | DahA                                   | 4.93E-09             | 134.1                     | 278             | 39.00               |
| Benzo[ghi]perylene                           | BghiP                                  | 1.01E-08             | 129.9                     | 276             | 38.91               |
| Coronene                                     | COR                                    | 3.56E-10             | 143.2                     | 300             | 28.71               |
| <b>iso-Alkane</b>                            |                                        |                      |                           |                 |                     |
| Pristane                                     | C <sub>19</sub> H <sub>40</sub>        | / <sup>c</sup>       | /                         | 57              | 23.24               |
| Phytane                                      | C <sub>20</sub> H <sub>42</sub>        | /                    | /                         | 57              | 24.69               |
| <b>Hopane</b>                                |                                        |                      |                           |                 |                     |
| $\alpha\beta$ -Nnorhopane                    | C <sub>29</sub> - $\alpha\beta$ -NOR-H | 2.74E-06             | 126                       | 191             | 37.77               |
| $\alpha\beta$ -Hopane                        | C <sub>30</sub> - $\alpha\beta$ -H     | 1.01E-06             | 130                       | 191             | 38.54               |
| $\alpha\beta$ -22R-Homohopane                | C <sub>31</sub> - $\alpha\beta$ -R     | 3.85E-07             | 134                       | 191             | 39.56               |
| ab 22S-Homohopane                            | C <sub>31</sub> - $\alpha\beta$ -S     | 3.85E-07             | 134                       | 191             | 39.70               |
| 22,29,30-Trisnorhopane                       | Tm                                     | 1.93E-05             | 117                       | 191             | 36.63               |
| <b>Sterane</b>                               |                                        |                      |                           |                 |                     |
| $\alpha\alpha\alpha$ -20R Cholestane         | $\alpha\alpha\alpha$ -20R-C            | 2.03E-05             | 121                       | 217             | 37.29               |
| $\alpha\beta\beta$ -20R Cholestane           | $\alpha\beta\beta$ -20R-C              | /                    | /                         | 218             | 37.66               |
| $\alpha\beta\beta$ -20R24S-Methylcholestane  | $\alpha\beta\beta$ -20R-MEC            | 7.60E-06             | 125                       | 218             | 36.58               |
| $\alpha\alpha\alpha$ -20R24R-Ethylcholestane | $\alpha\alpha\alpha$ -20R-EC           | /                    | /                         | 217             | 37.29               |
| $\alpha\beta\beta$ -20R24R-Ethylcholestane   | $\alpha\beta\beta$ -20R-EC             | 2.84E-06             | 130                       | 218             | 37.66               |
| <b>n-Alkanes</b>                             |                                        |                      |                           |                 |                     |
| n-Undecane                                   | C <sub>11</sub> H <sub>24</sub>        | /                    | /                         | 57              | 12.39               |
| n-Dodecane                                   | C <sub>12</sub> H <sub>26</sub>        | /                    | /                         | 57              | 13.92               |
| n-Tridecane                                  | C <sub>13</sub> H <sub>28</sub>        | /                    | /                         | 57              | 16.10               |
| n-Tetradecane                                | C <sub>14</sub> H <sub>30</sub>        | /                    | /                         | 57              | 18.15               |
| n-Pentadecane                                | C <sub>15</sub> H <sub>32</sub>        | /                    | /                         | 57              | 20.26               |
| n-Hexadecane                                 | C <sub>16</sub> H <sub>34</sub>        | /                    | /                         | 57              | 21.63               |
| n-Heptadecane                                | C <sub>17</sub> H <sub>36</sub>        | /                    | /                         | 57              | 23.15               |

|                    |                                 |          |     |    |       |
|--------------------|---------------------------------|----------|-----|----|-------|
| n-Octadecane       | C <sub>18</sub> H <sub>38</sub> | /        | /   | 57 | 24.55 |
| n-Nonadecane       | C <sub>19</sub> H <sub>40</sub> | /        | /   | 57 | 25.87 |
| n-Eicosane         | C <sub>20</sub> H <sub>42</sub> | /        | /   | 57 | 27.12 |
| n-Heneicosane      | C <sub>21</sub> H <sub>44</sub> | /        | /   | 57 | 28.33 |
| n-Docosane         | C <sub>22</sub> H <sub>46</sub> | 3.24E-03 | 115 | 57 | 29.43 |
| n-Tricosane        | C <sub>23</sub> H <sub>48</sub> | 1.22E-03 | 120 | 57 | 30.61 |
| n-Tetracosane      | C <sub>24</sub> H <sub>50</sub> | 4.66E-04 | 124 | 57 | 31.55 |
| n-Pentacosane      | C <sub>25</sub> H <sub>52</sub> | 1.72E-04 | 129 | 57 | 32.43 |
| n-Hexacosane       | C <sub>26</sub> H <sub>54</sub> | 6.59E-05 | 133 | 57 | 33.09 |
| n-Heptacosane      | C <sub>27</sub> H <sub>56</sub> | 2.53E-05 | 137 | 57 | 33.36 |
| n-Octacosane       | C <sub>28</sub> H <sub>58</sub> | 9.42E-06 | 142 | 57 | 33.50 |
| n-Nonacosane       | C <sub>29</sub> H <sub>60</sub> | 3.55E-06 | 146 | 57 | 35.47 |
| n-Triacontane      | C <sub>30</sub> H <sub>62</sub> | 1.32E-06 | 151 | 57 | 37.31 |
| n-Hentriacontane   | C <sub>31</sub> H <sub>64</sub> | 4.96E-07 | 155 | 57 | 39.24 |
| n-Dotriacontane    | C <sub>32</sub> H <sub>66</sub> | 1.93E-07 | 160 | 57 | 37.66 |
| n-Tritriacontane   | C <sub>33</sub> H <sub>68</sub> | 7.09E-08 | 164 | 57 | 40.22 |
| n-Tetratriacontane | C <sub>34</sub> H <sub>70</sub> | 2.63E-08 | 169 | 57 | 38.75 |
| n-Pentatriacontane | C <sub>35</sub> H <sub>72</sub> | 1.00E-08 | 173 | 57 | 40.21 |
| n-Hexatriacontane  | C <sub>36</sub> H <sub>74</sub> | 3.75E-09 | 177 | 57 | 41.33 |
| n-Hepatriacontane  | C <sub>37</sub> H <sub>76</sub> | 1.42E-09 | 182 | 57 | 42.82 |
| n-Octatriacontane  | C <sub>38</sub> H <sub>78</sub> | 5.37E-10 | 186 | 57 | 43.55 |
| n-Nonatriacontane  | C <sub>39</sub> H <sub>80</sub> | 2.03E-10 | 191 | 57 | 45.13 |
| n-Tetracontane     | C <sub>40</sub> H <sub>82</sub> | 7.60E-11 | 195 | 57 | 46.21 |

58 <sup>a</sup>: pure compound vapor pressure, unit of Pa at 298 K, cited from And and Hanshaw, 2004, Xie et al., 2013;

59 <sup>b</sup>: vaporization enthalpy, unit of (KJ mol<sup>-1</sup>) at 298 K, cited from Xie et al., 2013, Wang et al., 2016;

60 <sup>c</sup>: “/” means lack of related data.

61

62

63

(a) Pyrene

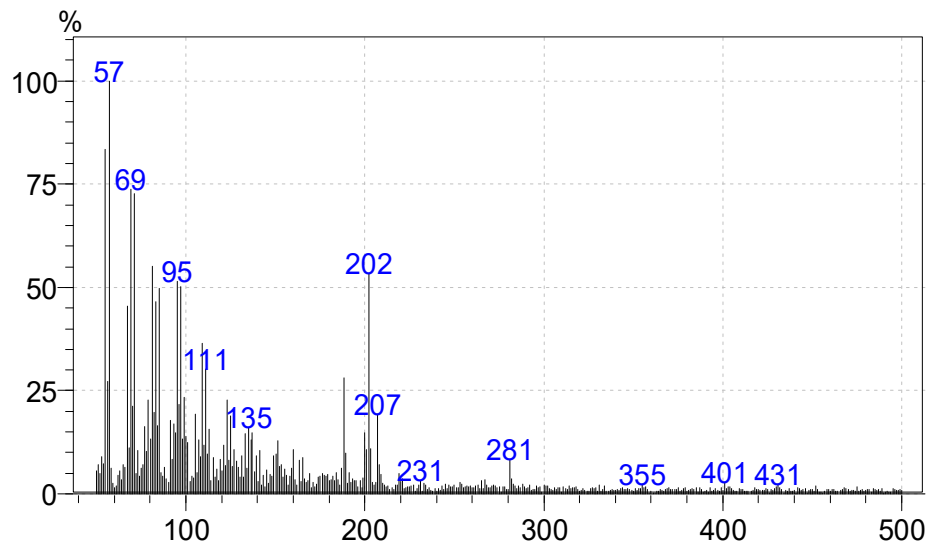

(b) Coronene

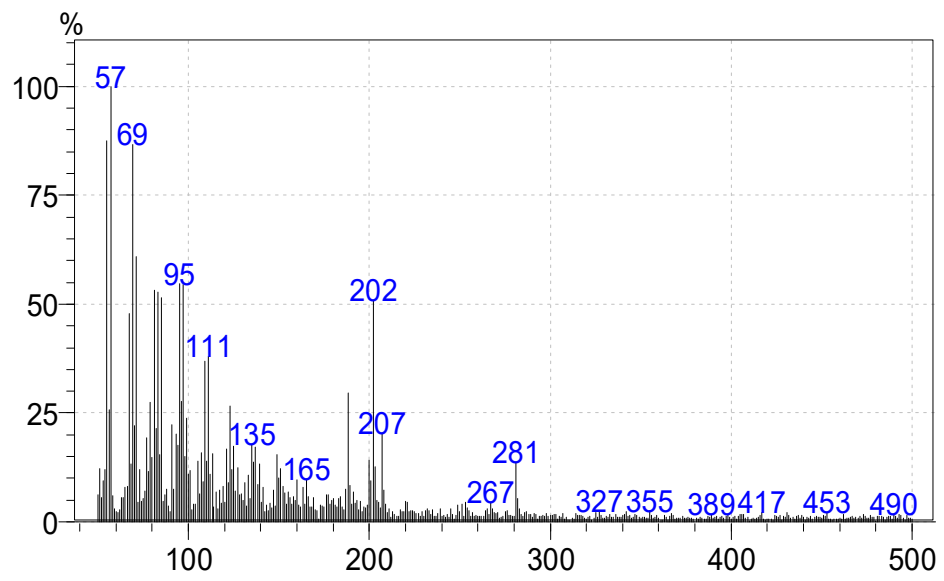

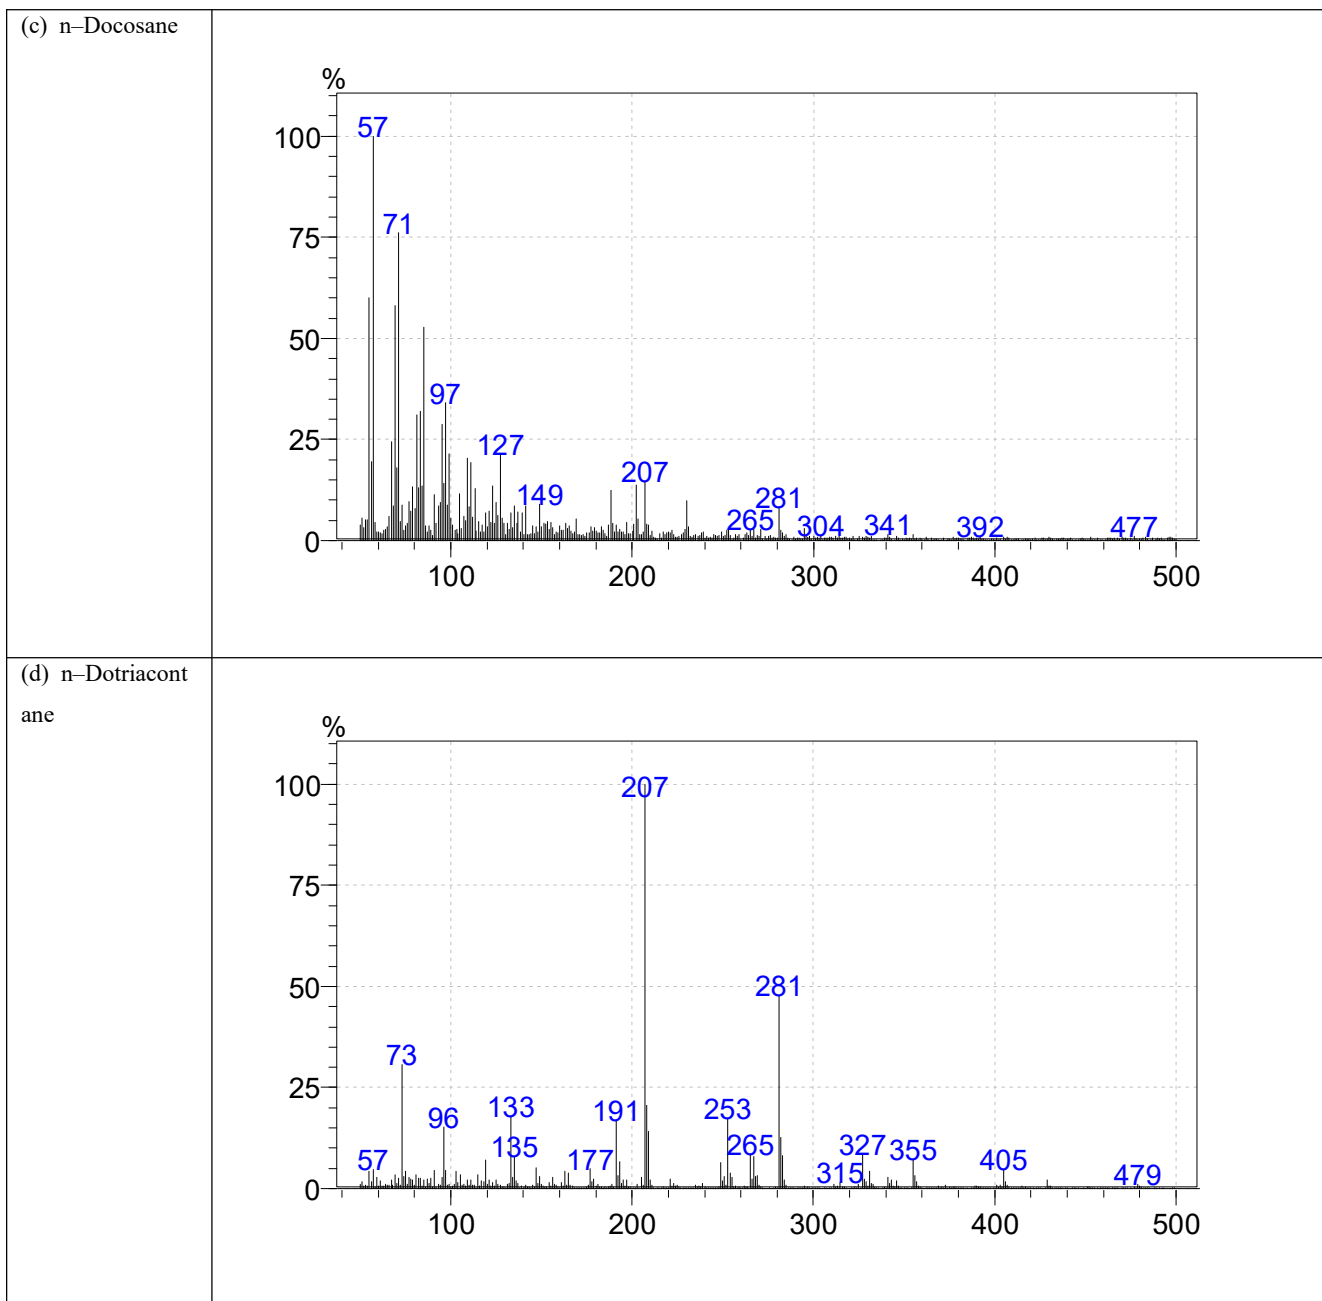

64 **Fig. S1.** Mass spectra of the several NPOCs species

65

66

67

68

69

70

71 **Section S3. The measured abundances of NPOCs and MDRs values in each sites**72 **Table S2.** Concentrations of NPOCs of each sampling site (ng m<sup>-3</sup>)

|                   | SH         | XY         | SL         | WQ         | JJ         | Average    |
|-------------------|------------|------------|------------|------------|------------|------------|
| PAHs              | 44.1±10.5  | 49.7±18.9  | 47.6±7.6   | 46.4±13.3  | 53.7±21.6  | 45.3±17.6  |
| Alkanes           | 134.7±56.6 | 109.5±33.5 | 93.2±31.9  | 96.6±31.0  | 130.4±74.8 | 112.9±55.1 |
| Hopanes           | 6.7±4.7    | 4.4±3.0    | 5.2±2.5    | 1.9±1.1    | 2.8±1.8    | 4.2±3.0    |
| Steranes          | 2.5±1.2    | 3.1±1.8    | 1.9±0.6    | 1.1±0.6    | 1.4±0.8    | 2.0±1.3    |
| NPOCs             | 187.9±59.6 | 166.7±47.3 | 147.8±33.4 | 146.0±42.8 | 188.2±92.1 | 167.3±68.4 |
| CPI               | 1.2±0.1    | 1.3±0.2    | 1.3±0.2    | 1.4±0.2    | 1.3±0.2    | 1.3±0.2    |
| WNA%              | 14.6±3.0   | 16.0±4.5   | 16.8±4.4   | 19.3±4.1   | 17.2±4.7   | 17.0±4.4   |
| PNA%              | 85.4±3.0   | 84.0±4.5   | 83.2±4.4   | 80.7±4.1   | 82.8±4.7   | 83.0±4.4   |
| C <sub>max</sub>  | C31        | C31        | C31        | C31        | C31        | C31        |
| ACL               | 29.2±0.8   | 28.8±0.7   | 28.5±0.7   | 29.7±0.7   | 29.3±0.8   | 29.1±0.8   |
| WAX <sub>cn</sub> | 20.3±11.2  | 16.8±5.8   | 15.6±6.6   | 18.3±6.3   | 20.9±10.9  | 17.3±9.1   |

73

74

75

76

77

78

79

80

81

82

83

84

85

86

87

88

89 **Section S4. Gas-particle partitioning for NPOCs**

90 To further evaluate gas-particle partitioning of NPOCs,  $\phi$  values were compared with predicted ones by Jungle–Pankow  
91 model (Fig. S2). The  $\phi$  values of LMW PAHs, short chain n-alkanes,  $\log P^o_L > -5$  hopanes and steranes, were  
92 underpredicted by Jungle–Pankow model. However, the  $\phi$  values predicted by Jungle–Pankow model agreed well with  
93 the calculated ones for HMW PAHs and long chain n-alkanes. Underestimation of  $\phi$  values of PAHs by Jungle–Pankow  
94 model compared with the filed measured ones were also reported by He and Balasubramanian, (2009), and they  
95 attributed the discrepancy to the higher OM fractions in real environment than that adopted by the model.

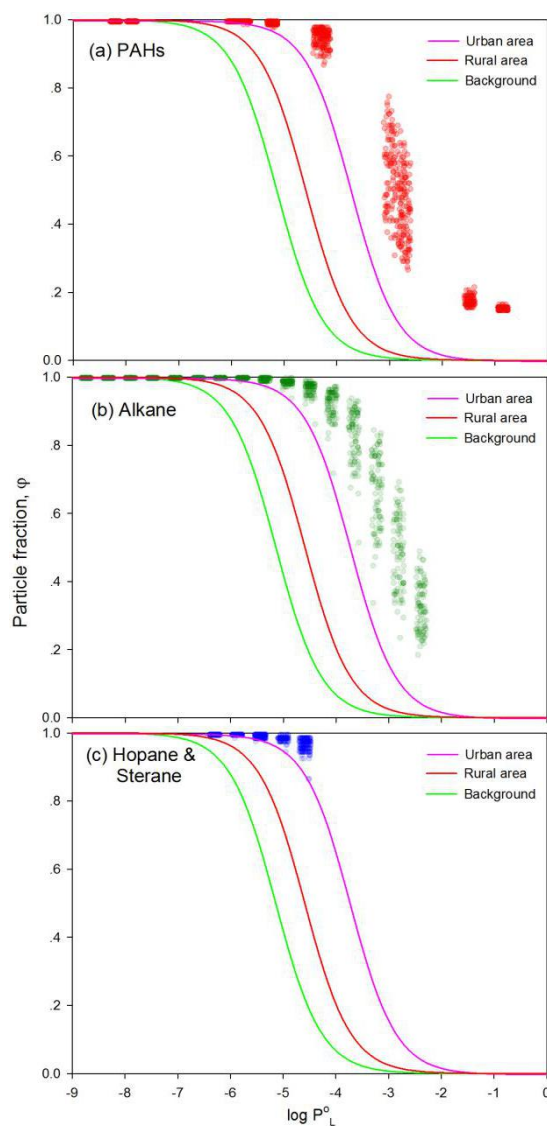

96

97

**Fig. S2.** Comparison of  $\phi$  values between the measured and predicted results from Jungle–Pankow model

98

99



100 Partition between gas and particle phases was evaluated by regression of  $K_p$  and subcooled vapor pressure  $P^{\circ}_L$  (Pa), using  
 101 the following equation:

102  $\log K_p = m_r \log P^{\circ}_L + b_r$  (S4)

103 Useful information pertaining to gas-particle partitioning can be drawn from the regressed parameter  $m_r$  and  $b_r$ .

104 The calculated and Jungle-Pankow model predicted  $\log K_p$  values were depicted in fig. S1. It can be clearly that the model  
 105 predicted  $\log K_p$  values were a bit lower than the empirical calculated ones, regardless of NPOCs species.

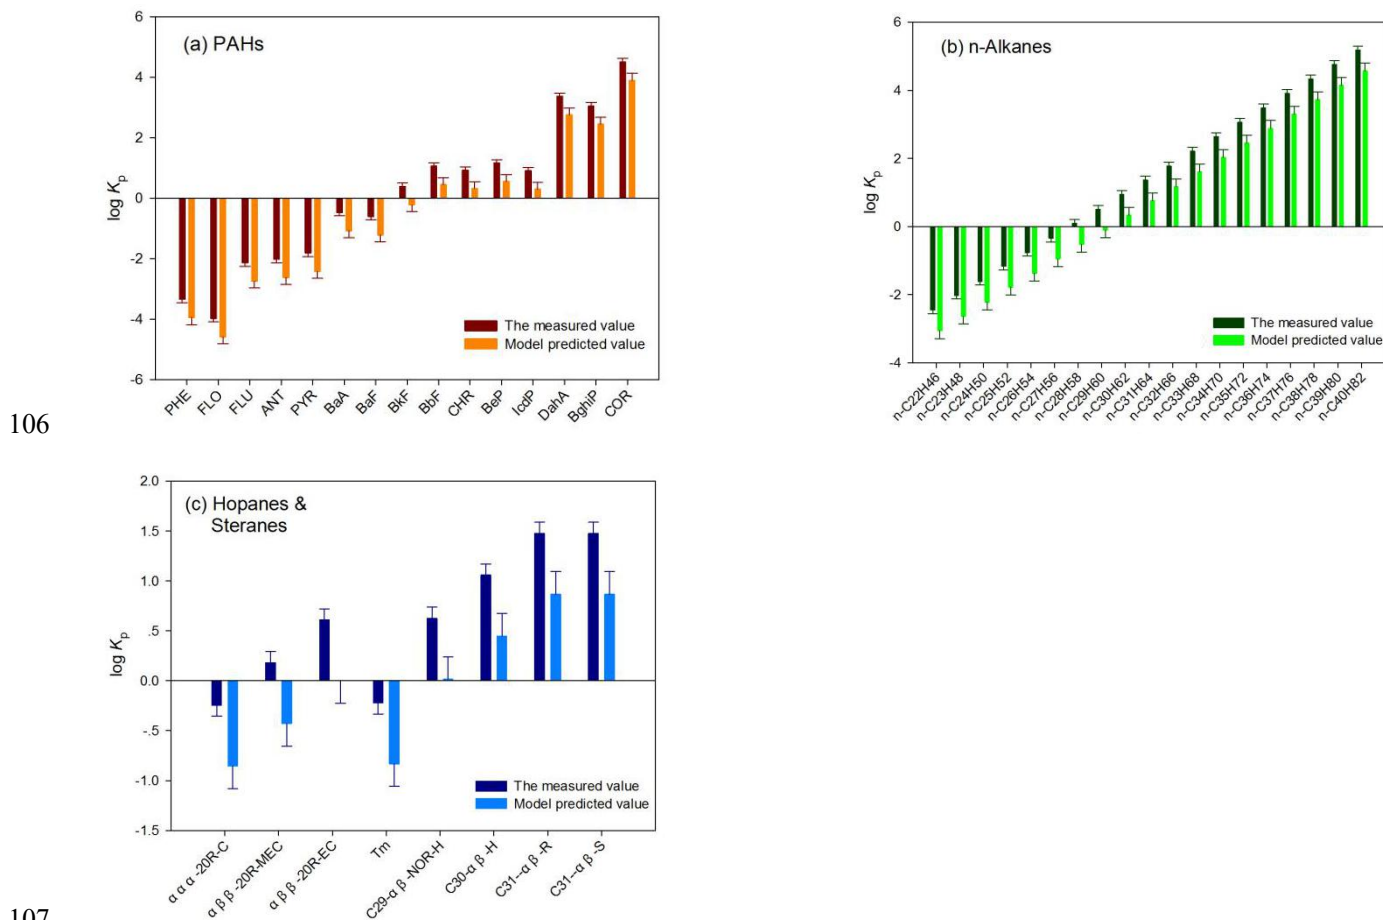

106

107

108 **Fig. S3.** Comparisons of the measured and model predicted  $\phi$  values

109

110

111

112

113

114

115

116

117

118

119 **Section S5. Source distributions extracted from single particle phase and gas-particle phases NPOCs as input data**

120 The contributions of individual source to the total concentrations for both PMF<sub>P</sub> and PMF<sub>T</sub> models were compared in Fig.  
121 S4. Secondary aerosol formation was the largest contributor, occupied 24.7% and 21.8% of the single and the total  
122 concentrations in PMF<sub>P</sub> and PMF<sub>T</sub>, respectively. Vehicles exhaust, biomass burning, dust, industrial emission and coal  
123 combustion were major contributors, occupying of 12.5%/15.0%, 12.7%/15.7%, 8.9%/11.0%, 13.8%/11.9% and  
124 17.5%/12.4% in PMF<sub>P</sub>/PMF<sub>T</sub>, respectively. For the light NPOCs source, the contributions of PMF<sub>P</sub> and PMF<sub>T</sub> models  
125 were 3.7% and 5.6% respectively, with a relatively high contribution for PMF<sub>T</sub> but much smaller in the PMF<sub>P</sub>.

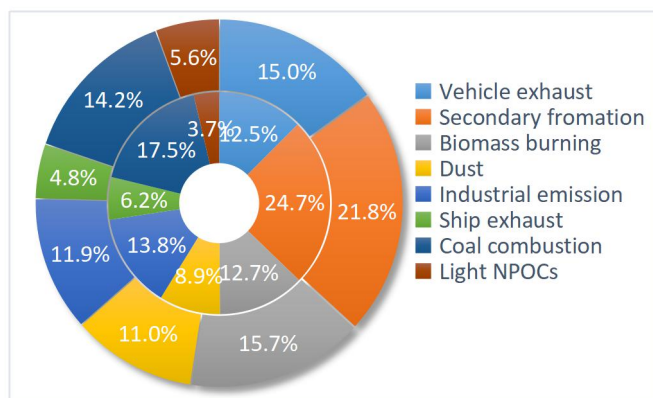

126 **Fig. S4.** Contributions of eight sources resolved by PMF (inner circular ring for single particle bound NPOCs, the outer  
127 circular ring for the total NPOCs)  
128  
129  
130  
131  
132  
133  
134  
135  
136  
137  
138  
139  
140  
141  
142  
143  
144  
145  
146  
147  
148

149 **Reference**

- 150 Basis, A., Voutsas, D., Samara, C. (2016). Atmospheric occurrence and gas-particle partitioning of PBDEs at industrial,  
151 urban and suburban sites of Thessaloniki, Northern Greece: implications for human health. *Environ. Pollut.* 215, 113-  
152 124.
- 153 Feng, J., Hu, M., Chan, C. K., Lau, P. S., Fang, M., He, L., and Tang, X.: A comparative study of the organic matter in  
154 PM<sub>2.5</sub> from three Chinese megacities in three different climatic zones, *Atmos. Environ.*, 40, 3983-3994, 2006.
- 155 Han, D., Ye, L., Zhang, C., Li, W., Ma, W.L., Li, Y. (2014). Gas-particle partitioning of polychlorinated biphenyls in air  
156 of Xi'an City. *China Environ. Sci.* 34 (10), 2466-2471.
- 157 Han D, Zhang J, Hu Z, Ma Y, Duan Y, Han Y, Chen X, Zhou Y, Cheng J, Wang W. (2018). Particulate mercury in ambient  
158 air in Shanghai, China: Size-specific distribution, gaseparticle partitioning, and association with carbonaceous  
159 composition. *Environ. Pollut.* 238, 543-553
- 160 Hien, T. T., Le, T. T., Kameda, T., Takenaka, N., and Bandow, H.: Distribution characteristics of polycyclic aromatic  
161 hydrocarbons with particle size in urban aerosols at the roadside in Ho Chi Minh City, Vietnam, *Atmos. Environ.*, 41,  
162 1575-1586, 2007.
- 163 Ho, S. S., and Yu, J. Z.: In-injection port thermal desorption and subsequent gas chromatography-mass spectrometric  
164 analysis of polycyclic aromatic hydrocarbons and n-alkanes in atmospheric aerosol samples, *J. Chromatography A*, 1059,  
165 121, 2004.
- 166 Wang, Q., Feng, Y., Huang, X. H. H., Griffith, S. M., Zhang, T., Zhang, Q., Wu, D., and Yu, J. Z.: Non-polar organic  
167 compounds as PM<sub>2.5</sub> source tracers: Investigation of their sources and degradation in the Pearl River Delta, China, *J.*  
168 *Geophy. Res. Atmos*, 2016.
- 169
